# Supplementary material for: Fatty Acids Prevent Hypoxia-Inducible Factor-1α Signaling Through Decreased Succinate in Diabetes
Source: PubMed Central journal article supplement (PMC6115650; doi:10.1016/j.jacbts.2018.04.005), 2018-08-28
Supplement: mmc1.pdf [file mmc1.pdf]

# Supplementary Table 1

| Primer List   |                |                            |                           |
|---------------|----------------|----------------------------|---------------------------|
| Gene          | NM             | Sense                      | Anti-sense                |
| <i>Fih-1</i>  | NM_176958.3    | GTCCCAGCTACGAAGTTACAGC     | CAGTGCAGGATACACAAGGTTT    |
| <i>Hif1A</i>  | NM_001313919   | TGAGCTCACATCTTGATAAAGCTTCT | GGGCTTTCAGATAAAAACAGTCCAT |
| <i>Hif1B</i>  | NM_001037737.2 | TTTATCCCTAGAGATGGGTACAGG   | CCACAGGCTGGACAGAAACC      |
| <i>Hmbs</i>   | NM_001110251.1 | TCCCTGAAGGATGTGCCTAC       | ACAAGGGTTTTCCCGTTTG       |
| <i>Hprt</i>   | NM_013556.2    | GACCGTTCTGTCATGTCG         | ACCTGGTTCATCATCACTAATCAC  |
| <i>Phd2</i>   | NM_053207.2    | AGTCCCATGAAGTGATCAAGTTCA   | ATCCGCATGATCTGCATGG       |
| <i>Phd3</i>   | NM_028133.2    | CAGACCGCAGGAATCCACAT       | TTCAGCATCGAAGTACCAGACAGT  |
| <i>Rpl13A</i> | NM_173340.2    | CCCTCCACCCTATGACAA         | GGTACTTCCACCCGACCTC       |
| <i>vhl</i>    | NM_009507.3    | CTCAGCCCTACCCGATCTTAC      | ACATTGAGGGATGGCACAAC      |

## Supplementary Table 2

| Summary of metabolomics in ischemic hearts |         |     |         |          |     |         |     |
|--------------------------------------------|---------|-----|---------|----------|-----|---------|-----|
|                                            | Control |     |         | Diabetic |     |         | Sig |
|                                            | Average | +/- | S.E.M   | Average  | +/- | S.E.M   |     |
| <b>Glycolysis</b>                          |         |     |         |          |     |         |     |
| Glucose 6 phosphate                        | 0.8807  | +/- | 0.2399  | 0.2031   | +/- | 0.0355  | *   |
| Fructose 6 phosphate                       | 0.6969  | +/- | 0.1748  | 0.2148   | +/- | 0.0344  | *   |
| Fructose 1,6-bisphosphate                  | 0.1571  | +/- | 0.0350  | 0.1118   | +/- | 0.0188  | n.s |
| Glyceraldehyde 3 phosphate                 | 0.0143  | +/- | 0.0006  | 0.0117   | +/- | 0.0005  | *   |
| Dihydroxyacetone phosphate                 | 0.0007  | +/- | 0.0003  | 0.0004   | +/- | 0.0000  | n.s |
| 2-phosphoglycerate/<br>3-phosphoglycerate  | 0.6969  | +/- | 0.1748  | 0.2148   | +/- | 0.0344  | *   |
| Phosphoenolpyruvate                        | 0.0229  | +/- | 0.0075  | 0.0203   | +/- | 0.0019  | n.s |
| Pyruvate                                   | 0.00005 | +/- | 0.00001 | 0.00004  | +/- | 0.00000 | n.s |
| <b>Krebs Cycle</b>                         |         |     |         |          |     |         |     |
| Acetyl-CoA                                 | 0.0204  | +/- | 0.0067  | 0.0049   | +/- | 0.0025  | Ω   |
| Citrate                                    | 0.2510  | +/- | 0.0577  | 0.1967   | +/- | 0.0295  | n.s |
| Aconitate                                  | 0.0625  | +/- | 0.0060  | 0.0562   | +/- | 0.0057  | n.s |
| Isocitrate                                 | 0.0287  | +/- | 0.0071  | 0.0283   | +/- | 0.0056  | n.s |
| α Ketoglutarate                            | 0.1286  | +/- | 0.0071  | 0.1153   | +/- | 0.0064  | n.s |
| Succinyl-CoA                               | 0.0010  | +/- | 0.0002  | 0.0010   | +/- | 0.0003  | n.s |
| Succinate                                  | 0.3914  | +/- | 0.0289  | 0.3371   | +/- | 0.0389  | Ω   |
| Fumarate                                   | 0.0060  | +/- | 0.0009  | 0.0052   | +/- | 0.0003  | n.s |
| Malate                                     | 2.3096  | +/- | 0.2060  | 2.1977   | +/- | 0.1490  | n.s |
| Oxaloacetate                               | 0.010   | +/- | 0.0034  | 0.0081   | +/- | 0.0017  | n.s |
|                                            | n = 6   |     |         | n = 7    |     |         |     |

\* p < 0.05 vs control, Ω p < 0.06 vs control

Data expressed as peak area ratio, relative to internal standard

## Supplementary Figure 1

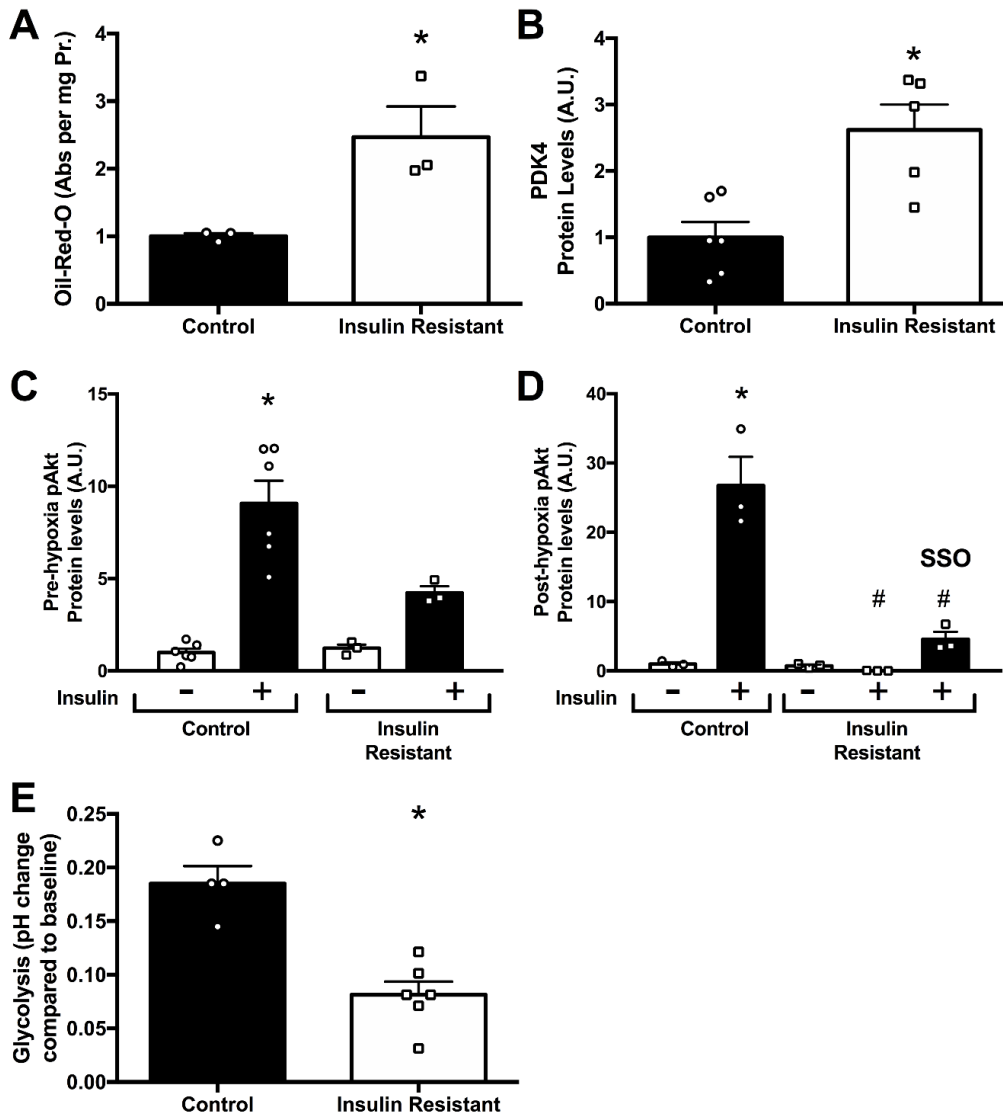

Beating HL-1 cardiomyocytes were cultured with media containing palmitate (500  $\mu$ M, bound to BSA 6:1) and insulin (50 nM) for 8 hours. Cells had metabolic hallmarks of insulin resistance, including increased oil-red-O staining for intracellular lipids and increased PPAR $\alpha$  target protein PDK4 (A and B). In addition, insulin resistant cells had decreased insulin-stimulated glycolytic rates, as assessed using a pH-Xtra glycolysis assay kit (Luxcel Biosciences Ltd) on a fluorescence plate reader FLUOstar Omega series (BMG labtech) analyzed using MARS (BMG labtech) (E). Impaired insulin signaling was demonstrated by decreased insulin-stimulated Akt phosphorylation in response to 30 min of insulin stimulation (200 nM) (C). Insulin resistance was further confirmed after an additional 16 hours in hypoxia by insulin-induced Akt phosphorylation (D). Sulfo-N-succinimidyl oleate (SSO) blocked fatty acid uptake immediately prior to hypoxia, but cells remained insulin resistant as shown by decreased p-Akt in response to insulin stimulation (D). \*  $p < 0.05$  vs. control unstimulated, #  $p < 0.05$  vs. control insulin-stimulated.

# Supplementary Figure 2

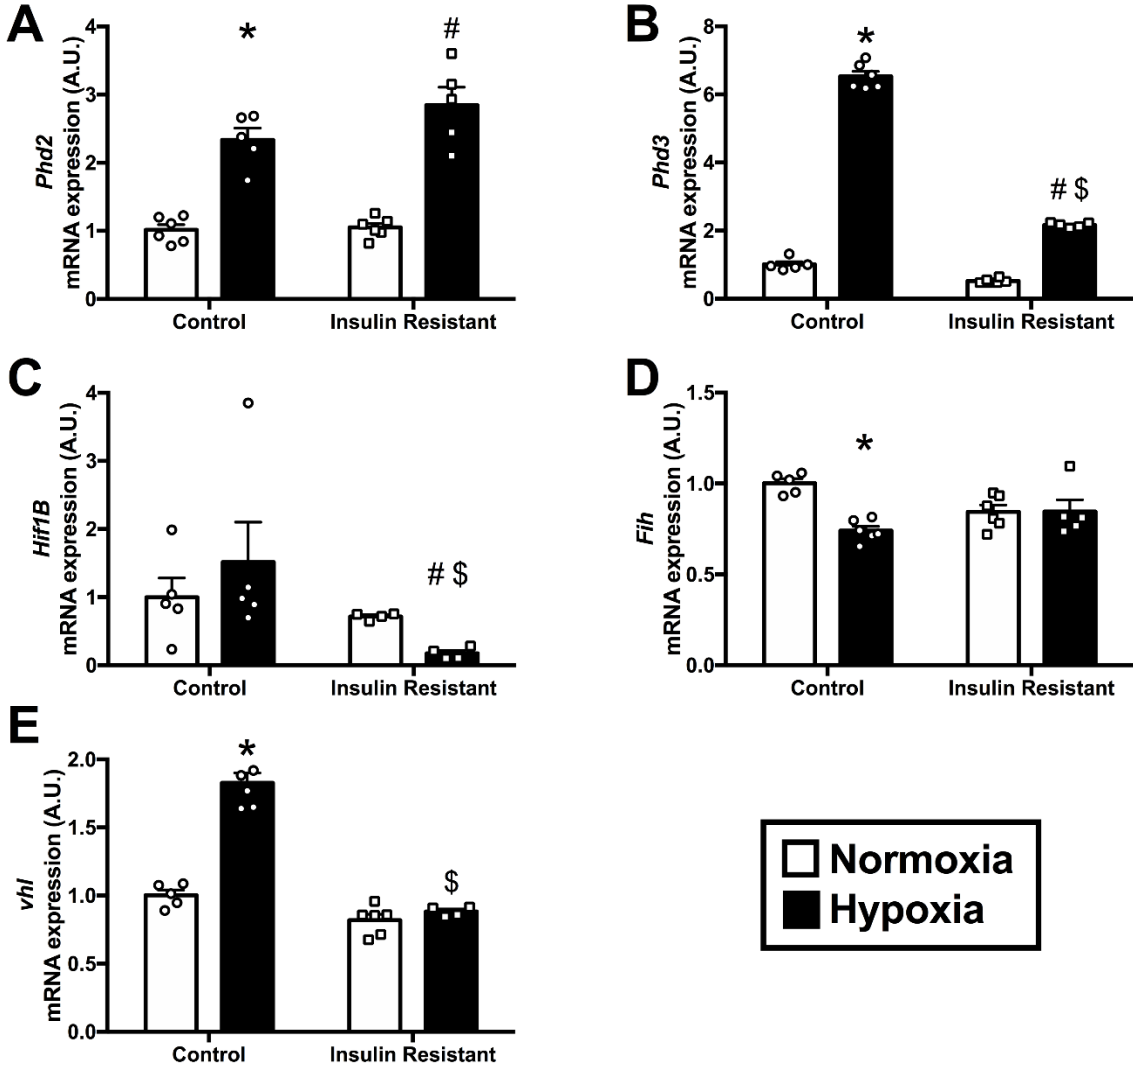

mRNA expression of *Phd2*, *Phd3*, *Hif1B*, *Fih* and *vhl* in control and insulin resistant cardiomyocytes cultured in normoxia and hypoxia (A - E). \* p < 0.05 vs. normoxic control, # p < 0.05 vs. normoxic insulin resistant, \$ p < 0.05 vs. hypoxic control.
